# Supplementary material
Source: ML conference proceedings conference paper supplement (https://aclanthology.org/2026.semeval-1.373)

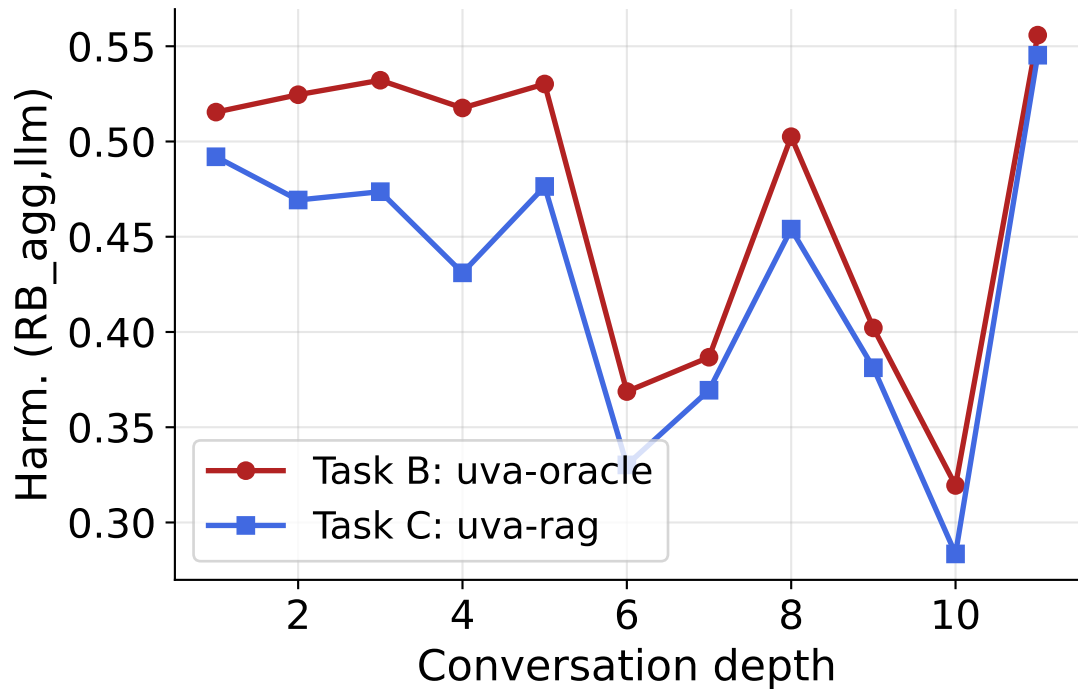

Supplement: SupplementaryMaterial [file depth_plot_hmean_idk.pdf › plots/depth_plot_hmean_idk.pdf]

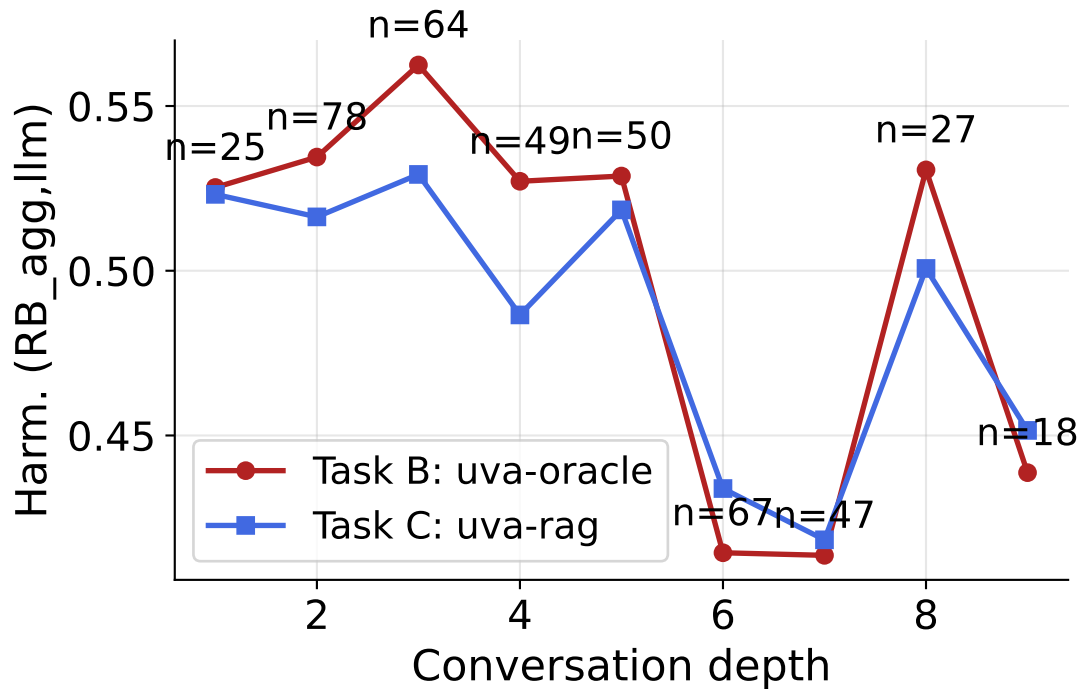

Supplement: SupplementaryMaterial [file depth_plot_hmean_standard.pdf › plots/depth_plot_hmean_standard.pdf]

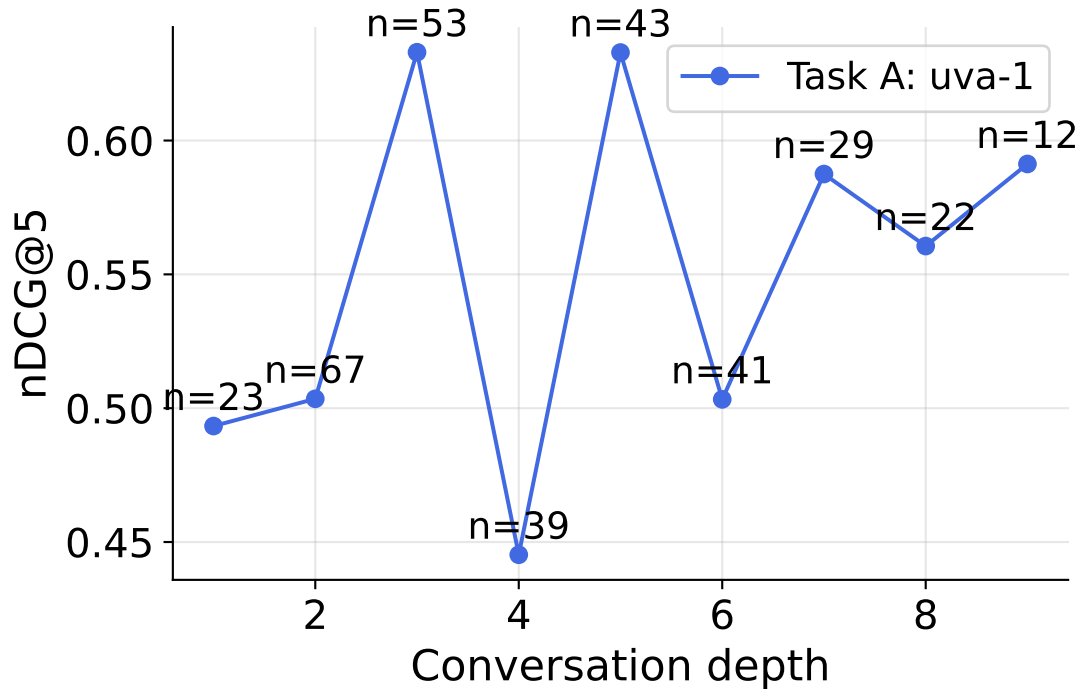

Supplement: SupplementaryMaterial [file graph.pdf › plots/graph.pdf]

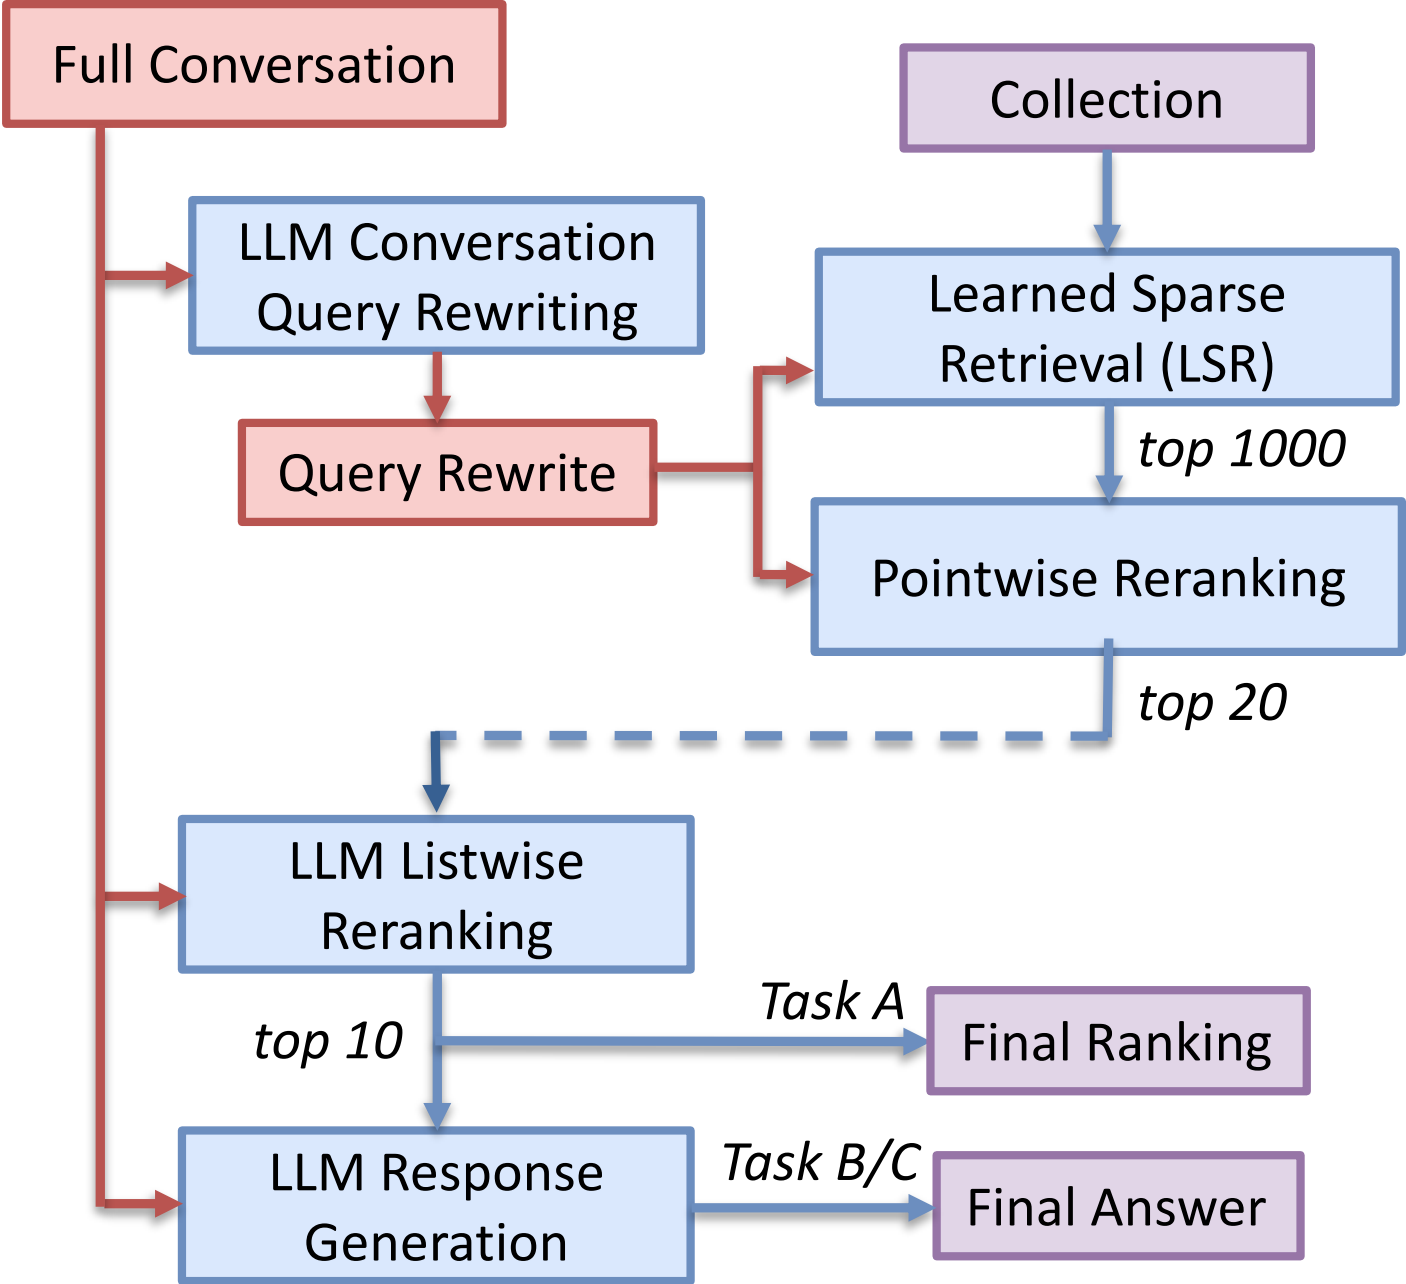

Supplement: SupplementaryMaterial [file pipeline.pdf › plots/pipeline.pdf]

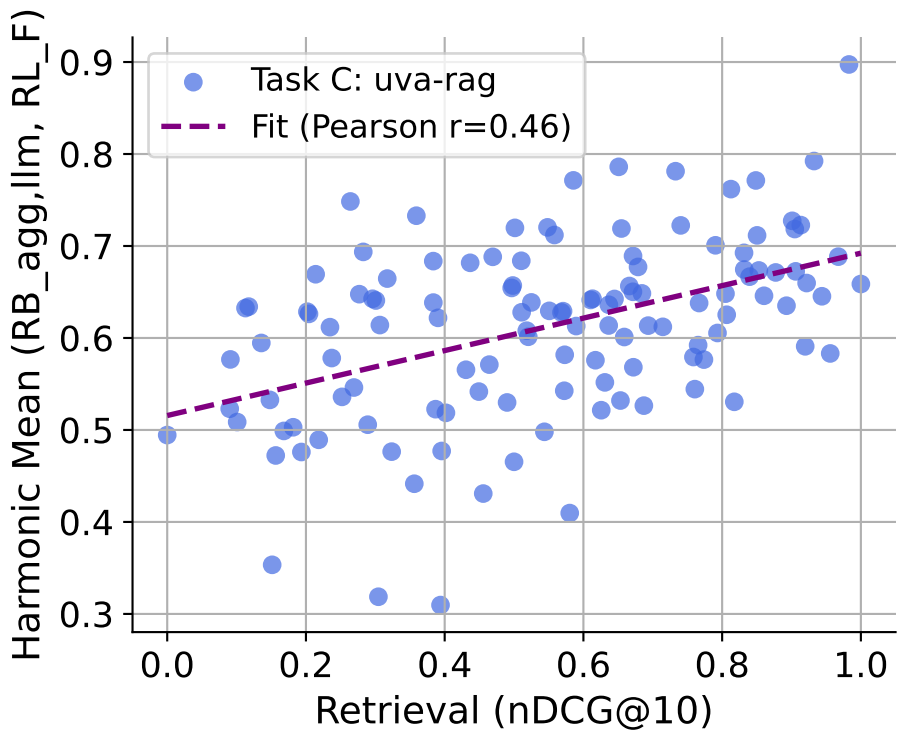

Supplement: SupplementaryMaterial [file scatter_aggregated_Hmean.pdf › plots/scatter_aggregated_Hmean.pdf]

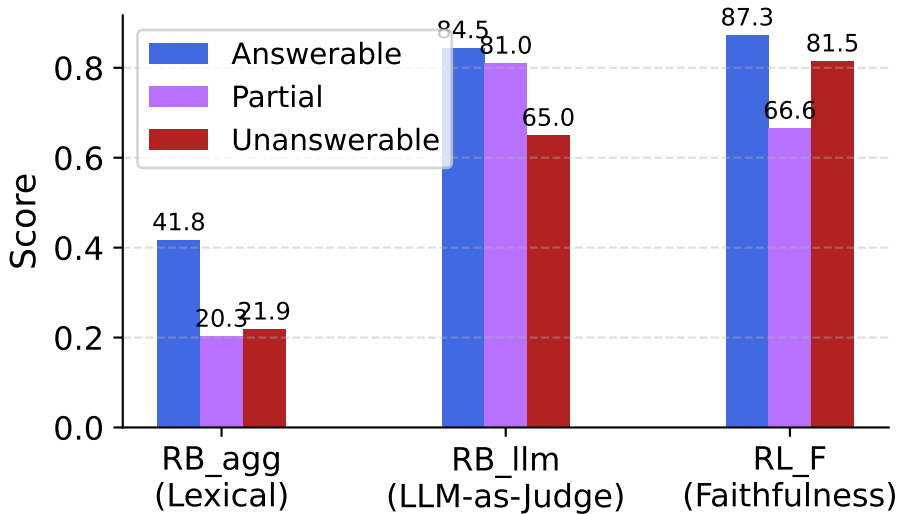

Supplement: SupplementaryMaterial [file taskC_answerability_breakdown.pdf › plots/taskC_answerability_breakdown.pdf]
